# Supplementary material for: Does Rural Credit Participation Promote the Adoption of New Technologies by Family Farms? Evidence from Two Family Farm Demonstration Areas in China
Source: Research Square preprint supplement (doi:10.21203/rs.3.rs-5863029/v1), 2025-02-03
Supplement: Supplementary file 1 [file 2446f6f12cff9cf9e144efce.xlsx]

## Sheet: Sheet1
Table 9 The impacts of informal rural credit on new technology adoption by scale
	Full sample	By area		By income		By expenditure
		Large farms	Small farms	Large	Small farms	Large	Small farms
				farms		farms
Wuhan
Knearest neighbor matching	0.1996	-0.1901	0.4108	0.2099	0.2303	0.7611***	-0.0801
	(0.92)	(-0.66)	(1.63)	(0.66)	(0.85)	(2.58)	(-0.28)
Caliper matching	0.1905	-0.2002	0.3403	0.2301	0.02	0.5101*	0.01
	(1.07)	(-0.72)	(1.19)	(0.74)	(0.1)	(1.79)	(0.05)
Kernel matching	0.1202	-0.1702	0.4108*	0.1501	0.03	0.3906	0.03
	(0.72)	(0.67)	(1.67)	(0.61)	(0.14)	(1.52)	(0.15)
Langxi
Knearest neighbor matching	0.1502	0.1298	-0.1398	0.5603*	-0.2797	0.1501	-0.4997
	(0.55)	(0.35)	(-0.38)	(1.74)	(-0.75)	(0.43)	(-1.44)
Caliper matching	0.3508	0.4801*	0	0.7614***	-0.1401	0.2898	-0.02
	(1.58)	(1.65)	(0.01)	(2.82)	(-0.49)	(0.95)	(-0.05)
Kernel matching	0.2803	0.4502*	0.1201	0.7106***	-0.13	0.3096	0.0699
	(1.43)	(1.68)	(0.46)	(2.82)	(-0.50)	(1.13)	(0.23)
Note: ***, ** and * indicate significance at 1%, 5% and 10% levels, respectively, with Zstatistics in brackets.
