# Supplementary material for: Does Rural Credit Participation Promote the Adoption of New Technologies by Family Farms? Evidence from Two Family Farm Demonstration Areas in China
Source: Research Square preprint supplement (doi:10.21203/rs.3.rs-5863029/v1), 2025-02-03
Supplement: Supplementary file 2 [file 52dc26eb2c0c6b5b5d1db1c3.xlsx]

## Sheet: Sheet1
Table 3 Descriptive statistics of variables.
Variables	Wuhan		Langxi
	Mean	Standard deviation	Mean	Standard deviation
New Technology Adoption	1.3562	1.2202	1.5894	1.208
Formal credit	0.1974	0.3989	0.6748	0.4694
Informal credit	0.4592	0.4994	0.2439	0.4303
Gender	0.8541	0.3538	0.9106	0.2859
Age	3.1545	0.8106	3.2154	0.7494
Education	3.8884	0.8017	3.1423	0.9214
Training Participation	0.7897	0.4084	0.7724	0.4202
Number of Laborers	3.4936	1.1749	3.2805	1.1242
Family fortunes	0.0558	0.23	0.0407	0.1979
Technical Services	0.7597	0.4282	0.752	0.4327
Subsidies	0.6695	0.4714	0.6911	0.463
Planting Type	0.412	0.4933	0.748	0.4351
Breeding Type	0.3948	0.4899	0.1789	0.384
Income-to-Expenditure Ratio	2.659	3.5948	3.0786	5.5033
Operation Scale	5.3659	0.824	5.553	0.7425
Financial Regulation	1.9785	0.8732	2.0163	0.8805
Demonstration Farm	0.6781	0.4682	0.5976	0.4914
Talents employment	0.2275	0.4201	0.1016	0.3028
Agricultural Insurance	0.2489	0.4333	0.5772	0.495
Cooperative Membership	0.3691	0.4836	0.4512	0.4986
Village Cadre Position	0.0429	0.2031	0.0447	0.2071
Government/Finance Work	0.0687	0.2534	0.0772	0.2675
Demonstration Effect	1.4274	0.6408	1.6705	0.2487
Samples	233		246
