# Supplementary material for: Does Rural Credit Participation Promote the Adoption of New Technologies by Family Farms? Evidence from Two Family Farm Demonstration Areas in China
Source: Research Square preprint supplement (doi:10.21203/rs.3.rs-5863029/v1), 2025-02-03
Supplement: Supplementary file 3 [file 77cbbe89ec25cf43c629c57d.xlsx]

## Sheet: Sheet1
Table 5 Propensity Scores Models for Formal Rural Credit.
Variables	Wuhan		Langxi
	Model 1	Model 2	Model 3	Model 4
Gender	0.4632		-0.4612
	(0.74)		(-0.77)
Age	0.391		-0.1867
	(1.47)		(-0.83)
Education	0.1162		0.2117
	(0.44)		(1.08)
Training Participation	0.834		0.012
	(1.61)		(0.03)
Number of Laborers	0.2136		0.2399
	(1.2)		(1.61)
Family fortunes	-0.5191		-0.6218
	(-0.56)		(-0.75)
Technical Services	0.314		0.1852
	(0.65)		(0.49)
Subsidies	0.6224		0.9302***	0.9408***
	(1.35)		(2.72)	(2.94)
Planting Type	-0.9477*	-1.0288**	-0.2549	-0.2181
	(-1.72)	(-1.99)	(-0.42)	(-0.38)
Breeding Type	0.5267	0.271	-0.2079	-0.1911
	(0.99)	(0.56)	(-0.30)	(-0.30)
IncometoExpenditure Ratio	0.0975		-0.0081
	(1.50)		(-0.27)
Operation Scale	0.4382*	0.5857***	0.4681*	0.5358**
	(1.66)	(2.58)	(1.88)	(2.35)
Financial Regulation	-0.4665**	-0.4164*	-0.3187	-0.3697**
	(-1.96)	(-1.91)	(-1.57)	(-2.02)
Demonstration Farm	0.2629		0.6364*	0.6428**
	(0.55)		(1.85)	(1.99)
Talents employment	0.1801		0.7423
	(0.38)		(1.09)
Agricultural Insurance	1.1305**	1.0975***	0.2118
	(2.49)	(2.73)	(0.6)
Cooperative Membership	0.665		0.5797*	0.6400**
	(1.63)		(1.71)	(2.00)
Village Cadre Position	-1.0498		-0.6631
	(-0.88)		(-0.86)
Government/Finance Work	0.834		-0.227
	(1.20)		(-0.39)
Demonstration Effect	1.2545***	1.0017***	1.522**	1.3332**
	(3.25)	(3.19)	(2.15)	(2.02)
Constant term	-8.2176***	-5.3940***	-5.2880**	-4.6690**
	(-3.21)	(-3.48)	(-2.22)	(-2.55)
Pseudo	0.226	0.15	0.19	0.161
Note: ***, ** and * indicate significance at 1%, 5% and 10% levels, respectively, with Zstatistics in brackets.
