# Supplementary material for: Does Rural Credit Participation Promote the Adoption of New Technologies by Family Farms? Evidence from Two Family Farm Demonstration Areas in China
Source: Research Square preprint supplement (doi:10.21203/rs.3.rs-5863029/v1), 2025-02-03
Supplement: Supplementary file 4 [file a4674fe44fb12541bac8c7f6.xlsx]

## Sheet: Sheet1
Table 7 The comparison of ATT of formal and informal rural credit.
Dependent variables	Wuhan		Langxi
	Formal financial credit	Informal financial credit	Formal financial credit	Informal financial credit
New technology adoption	0.5498*	0.1996	0.6098**	0.1502
	(1.74)	(0.92)	(2.31)	(0.55)
High Capital, High Risk	0.15	0.0598	0.1801	-0.0599
	(1.21)	(0.65)	(1.58)	(-0.54)
High Capital, Low Risk	0.1792*	-0.0099	0.1700**	0.03
	(1.74)	(-0.14)	(2.5)	(0.39)
Low Capital, High Risk	0.1800	0.1402*	0.1801	0.1905*
	(1.50)	(1.71)	(1.58)	(1.78)
Low Capital, Low Risk	0.05	0.01	0.0803	-0.0199
	(0.41)	(0.12)	(0.73)	(-0.15)
High Capital	0.2493**	0.0804	0.2098*	-0.01
	(2.06)	(0.98)	(1.84)	(-0.08)
High Risk	0.1802	0.1403*	0.1204	0.0898
	(1.43)	(1.67)	(1.02)	(0.88)
Note: ***, ** and * indicate significance at 1%, 5% and 10% levels, respectively, with Z-statistics in brackets
