# Supplementary material for: Does Rural Credit Participation Promote the Adoption of New Technologies by Family Farms? Evidence from Two Family Farm Demonstration Areas in China
Source: Research Square preprint supplement (doi:10.21203/rs.3.rs-5863029/v1), 2025-02-03
Supplement: Supplementary file 5 [file baa24c68fef67f2478acb68d.xlsx]

## Sheet: Sheet1
Table 1 Technology Classification.
Capital Input	Uncertainty	Technology names
high	high	New varieties, New fertilizers
high	low	New machinery
low	high	New pesticide, Pest control method
low	low	New production method new management method
