# Supplementary material for: Does Rural Credit Participation Promote the Adoption of New Technologies by Family Farms? Evidence from Two Family Farm Demonstration Areas in China
Source: Research Square preprint supplement (doi:10.21203/rs.3.rs-5863029/v1), 2025-02-03
Supplement: Supplementary file 6 [file cf64852b8db3a56c4aebbf71.xlsx]

## Sheet: Sheet1
Table 8 The impacts of formal rural credit on new technology adoption by scale
	Full sample	By area		By income		By expenditure
		Large	Small	Large farms	Small farms	Large	Small
		farms	farms			farms	farms
Wuhan
K-nearest neighbor matching	0.5296*	0.8194**	-0.42	-0.52	0.4502	0.4596	0.36
	(1.65)	(2.41)	(0.70)	(1.25)	(1.09)	(1.20)	(0.60)
Caliper matching	0.4400*	0.5896**	-0.3497	0.03	-0.02	0.5909**	-0.01
	(1.76)	(2.04)	(0.87)	(0.08)	(0.06)	(2.01)	(0.01)
Kernel matching	0.3795*	0.5592**	-0.5103	-0.03	0.1698	0.2998	0.4995
	(1.65)	(1.99)	(1.26)	(0.10)	(0.44)	(1.09)	(1.03)
Langxi
K-nearest neighbor matching	0.6098**	0.6609*	0.4697	0.3896	0.3097	1.0896*	0.4806*
	(2.31)	(1.73)	(1.53)	(1.02)	(0.98)	(1.81)	(1.8)
Caliper matching	0.4300**	0.6890**	0.2503	0.4199	0.09	1.2396*	0.5009**
	(2.00)	(1.98)	(0.91)	(1.16)	(0.3)	(1.91)	(1.98)
Kernel matching	0.4494**	0.6698**	0.34	0.5494*	0.1098	0.9801*	0.4206*
	(2.14)	(1.97)	(1.25)	(1.64)	(0.38)	(1.65)	(1.76)
Note: ***, ** and * indicate significance at 1%, 5% and 10% levels, respectively, with Z-statistics in brackets.
