# Supplementary material for: Does Rural Credit Participation Promote the Adoption of New Technologies by Family Farms? Evidence from Two Family Farm Demonstration Areas in China
Source: Research Square preprint supplement (doi:10.21203/rs.3.rs-5863029/v1), 2025-02-03
Supplement: Supplementary file 7 [file ddebfb1d070ad8383bf6a888.xlsx]

## Sheet: Sheet1
Table 6 ATT of formal financial credit
	Treatment group	Control group	ATT	Standard error	t statistic
Wuhan
New technology adoption	1.7	1.15	0.5500*	0.3152	1.74
High Capital, High Risk	0.575	0.425	0.15	0.1237	1.21
High Capital, Low Risk	0.3	0.125	0.1750*	0.1003	1.74
Low Capital, High Risk	0.425	0.25	0.175	0.1163	1.5
Low Capital, Low Risk	0.4	0.35	0.05	0.1224	0.41
High Capital	0.675	0.425	0.2500**	0.1211	2.06
High Risk	0.675	0.5	0.175	0.1223	1.43
Langxi
New technology adoption	1.8282	1.2209	0.6074**	0.2633	2.31
High Capital, High Risk	0.5583	0.3804	0.1779	0.1124	1.58
High Capital, Low Risk	0.2638	0.092	0.1718**	0.0686	2.5
Low Capital, High Risk	0.5521	0.3742	0.1779	0.1125	1.58
Low Capital, Low Risk	0.454	0.3742	0.0798	0.1088	0.73
High Capital	0.638	0.4294	0.2086*	0.1136	1.84
High Risk	0.7055	0.589	0.1166	0.1138	1.02
Note: ***, ** and * indicate significance at 1%, 5% and 10% levels, respectively, with Z-statistics in brackets.
