# Supplementary material for: Does Rural Credit Participation Promote the Adoption of New Technologies by Family Farms? Evidence from Two Family Farm Demonstration Areas in China
Source: Research Square preprint supplement (doi:10.21203/rs.3.rs-5863029/v1), 2025-02-03
Supplement: Supplementary file 8 [file e103e5fe1f5ebe6732b6fe56.xlsx]

## Sheet: Sheet1
Table A2 Probit Model Results (Robustness Test)
Variable names	Hubei Wuhan		Anhui Langxi
	Model 1	Model 2	Model 3	Model 4
Gender	0.1472		-0.2618
	(0.45)		(-0.77)
Age	0.2057		-0.095
	(1.39)		(-0.72)
Education	0.0441		0.1277
	(0.3)		(1.11)
Training Participation	-0.3976		0.009
	(-1.4)		(0.04)
Number of Laborers	0.1166		0.1238
	(1.19)		(1.44)
Family fortunes	-0.3108		-0.4266
	(-0.6)		(-0.9)
Subsidies	-0.2064		0.1199
	(-0.77)		(0.55)
Planting Type	0.2902		0.5562***	0.5806***
	(1.17)		(2.74)	(3.04)
Breeding Type	-0.426	0.5339*	0.1928	0.1518
	(-1.42)	(-1.88)	(-0.51)	(-0.43)
IncometoExpenditure Ratio	0.2851	0.131	0.1642	0.1319
	(0.96)	(0.48)	(-0.39)	(-0.34)
Operation Scale	0.0482		0.0061
	(1.34)		(-0.38)
Financial Regulation	0.2661*	0.3430***	0.2774*	0.3221**
	(1.81)	(2.68)	(1.94)	(2.44)
Demonstration Farm	0.2412*	-0.2118*	-0.188	-0.2138**
	(-1.87)	(-1.78)	(-1.58)	(-1.98)
Talents employment	0.0842		0.3692*	0.3744*
	(0.32)		(1.81)	(1.94)
Agricultural Insurance	0.2538		0.3901
	(0.98)		(1.06)
Cooperative Membership	0.5998**	0.6110***	0.1428
	(2.38)	(2.68)	(0.7)
Village Cadre Position	0.3950*		0.3761*	0.3946**
	(1.71)		(1.89)	(2.11)
Government/Finance Work	-0.6448		-0.3688
	(-0.98)		(-0.8)
Demonstration Effect	0.413		-0.1288
	(1.03)		(-0.38)
Government subsidies	0.6118***	0.5369***	0.8381**	0.7443**
	(3.17)	(3.14)	(2.09)	(1.99)
Constant term	-4.3960***	-3.1356***	-3.0149**	-2.7245***
	(-3.23)	(-3.6)	(-2.18)	(-2.58)
Pseudo	0.218	0.144	0.189	0.161
Note: ***, ** and * indicate significance at 1%, 5% and 10% levels, respectively, with Zstatistics in brackets.
