# Supplementary material for: Does Rural Credit Participation Promote the Adoption of New Technologies by Family Farms? Evidence from Two Family Farm Demonstration Areas in China
Source: Research Square preprint supplement (doi:10.21203/rs.3.rs-5863029/v1), 2025-02-03
Supplement: Supplementary file 9 [file e5cf9e8ac27fa80ab3ba688c.xlsx]

## Sheet: Sheet1
Table 4 Family farms’ adoption of new technologies with different credit sources
Wuhan	Formal financial credit		Informal financial credit
	Treatment group	Control group	Treatment group	Control group
New Technology Adoption	1.7826	1.2513	1.4206	1.3016
High Capital, High Risk	0.587	0.4652	0.4953	0.4841
High Capital, Low Risk	0.3261	0.1497	0.1963	0.1746
Low Capital, High Risk	0.4565	0.3583	0.4393	0.3254
Low Capital, Low Risk	0.413	0.2781	0.2897	0.3175
Langxi	Formal financial credit		Informal financial credit
	Treatment group	Control group	Treatment group	Control group
New Technology Adoption	1.8313	1.0875	1.7167	1.5484
High Capital, High Risk	0.5663	0.4125	0.5	0.5215
High Capital, Low Risk	0.2651	0.075	0.2	0.2043
Low Capital, High Risk	0.5542	0.3375	0.5667	0.457
Low Capital, Low Risk	0.4458	0.2625	0.45	0.3656
