# Supplementary material for: Does Rural Credit Participation Promote the Adoption of New Technologies by Family Farms? Evidence from Two Family Farm Demonstration Areas in China
Source: Research Square preprint supplement (doi:10.21203/rs.3.rs-5863029/v1), 2025-02-03
Supplement: Supplementary file 10 [file edc65aebd4d0bb83d180196f.xlsx]

## Sheet: Sheet1
Table 2 Variable Selection.
Category	Names	Explanation
Dependent Variable	New Technology Adoption	Number of adopted new technologies, classified into high/low capital and high/low risk types
Independent Variables	Formal credit	Equals 1 if a loan is obtained from a formal institution, otherwise 0.
	Informal credit	Equals 1 if a loan is obtained informally (e.g., relatives or friends), otherwise 0.
Matching Variables(Person)	Gender	Male= 1, Female= 0.
	Age	Categories: Under 30 = 1, 31–40 = 2, 41–50 = 3, 51–60 = 4, Over 61 = 5.
	Education	Levels: No education = 1 to Undergraduate and above = 2~6.
	Training Participation	Equals 1 if participated in vocational training, otherwise 0.
Matching Variables(Family)	Number of Laborers	Total family laborers, excluding students.
	Family fortunes	Equals 1 if family assets exceed 10,000 CNY, otherwise 0.
Matching Variables(Production)	Technical Services	Equals 1 if technical services are provided by the government, otherwise 0.
	Subsidies	Equals 1 if subsidies are received, otherwise 0.
	Planting Type	Equals 1 for planting farms, otherwise 0.
	Breeding Type	Equals 1 for breeding farms, otherwise 0.
	Income-to-Expenditure Ratio	Ratio of operating income to expenses.
	Operation Scale	Logarithm of the total operating area.
	Financial Regulation	Levels: None = 1, Informal = 2, Fully regulated = 3.
	Demonstration Farm	Equals 1 if recognized as a demonstration farm, otherwise 0.
	Talents employment	Equals 1 if technical or management staff are hired, otherwise 0.
	Agricultural Insurance	Equals 1 if purchased, otherwise 0.
Matching Variables(Social)	Cooperative Membership	Equals 1 if a member of a cooperative, otherwise 0.
	Village Cadre Position	Equals 1 if a former village cadre, otherwise 0.
	Government/Finance Work	Equals 1 if a family member works in government or finance, otherwise 0.
	Demonstration Effect	Mean adoption rate of new technologies in demonstration farms within the same township.
