# Supplementary material for: Does Rural Credit Participation Promote the Adoption of New Technologies by Family Farms? Evidence from Two Family Farm Demonstration Areas in China
Source: Research Square preprint supplement (doi:10.21203/rs.3.rs-5863029/v1), 2025-02-03
Supplement: Supplementary file 11 [file fe60910a1e98696fff7dd1f4.xlsx]

## Sheet: Sheet1
Table A1 Balanced Hypothesis Test Results
Hubei Wuhan	Deviation	T test	P>|t|	Anhui Langxi	Deviation	T test	P>|t|
Planting Type	-3.3	-0.15	0.882	Planting Type	-9.5	-0.92	0.356
Breeding Type	0.8	0.04	0.97	Breeding Type	5.6	0.54	0.587
Operation Scale	-1	-0.04	0.965	Operation Scale	4.3	0.4	0.693
Financial Regulation	5	0.23	0.82	Financial Regulation	6.3	0.56	0.579
Demonstration Effect	8	0.4	0.69	Demonstration Effect	-7	-0.58	0.563
Agricultural Insurance	-5.8	-0.25	0.807	Subsidies	13.2	1.26	0.208
				Cooperative Membership	9.6	0.84	0.403
				Demonstration Farm	-10	-0.95	0.342
